# Supplementary material
Source: ML conference proceedings conference paper supplement (https://openaccess.thecvf.com/content/ICCV2023/html/Zong_DETRs_with_Collaborative_ICCV_2023_paper.html)
Supplement: Supplementary file 3 [file Zong_DETRs_with_Collaborative_ICCV_2023_supplemental.zip]

Archive with 2 entries (2 files):
- 04390-supp.pdf
- __MACOSX/._04390-supp.pdf
